# Supplementary material
Source: ML conference proceedings conference paper supplement (https://openreview.net/forum?id=3bcN6xlO6f)
Supplement: supplementary_material [file attachment]

## 810 A BENCHMARK: DOWNLOAD INSTRUCTIONS

811  
812 Our benchmark is released at <https://huggingface.co/datasets/viddiff/VidDiffBench>. It has complete  
813 instructions on how to access annotations, how to download external datasets, and all licenses for  
814 our annotations and the source video datasets.  
815

## 817 B BENCHMARK: DIFFERENCE ANNOTATION TAXONOMY GENERATION

818  
819 Each dataset underwent a thorough taxonomy generation process. Details for each dataset are pre-  
820 sented in this section. Most datasets were first processed with the Difference Proposer.  
821

### 823 B.1 GENERATING JIGSAWS DIFFERENCE ANNOTATION TAXONOMY FOR SURGERY VIDEOS

824  
825 To produce the JIGSAWS taxonomy for surgery videos, we first used the Difference Proposer to gen-  
826 erate difference candidates. As we found many proposed variations to be irrelevant, we consulted a  
827 surgeon from `anonymous.hospital.ç`. We first showed them a variety of videos from the JIGSAWS  
828 dataset and brainstormed visually discernible differences. Next, we shared the GPT-generated varia-  
829 tions with the surgeon and discussed which ones should be added to the brainstormed listed. Lastly,  
830 we dropped all differences that could not be annotated consistently. For instance, we removed "Sur-  
831 geon exploits robotic instrument's range of movement more efficiently in Video A than in Video B",  
832 as the difference is subject to interpretation.  
833

### 834 B.2 GENERATING EGO-EXO4D DIFFERENCE ANNOTATION TAXONOMY

835  
836 For datasets with expert annotation, such as Basketball, Soccer, and Music, we processed the ex-  
837 pert commentary with GPT instead of asking for difference proposals directly. We asked GPT to  
838 summarize the expert commentary using the following prompt:  
839

```
840 Below are a sequence of text strings.
841 The strings are written by experts who are watching videos of a
842 ↪ task with this description: "{action_descriptions}".
843 As the experts watch each video, they pause the video and record
844 ↪ verbal commentary about how that person is performing the
845 ↪ task.

846 Return a list of text strings that summarizes what are the key
847 ↪ visual cues that the expert is looking when they provide
848 ↪ feedback.
849 Each item in the list should be specific and testable, so that
850 ↪ anybody watching a single video can assess whether that
851 ↪ visual cue applies to a particular video.

852 Your response should be a json with this structure:
853 { "summary_texts" : ["text0", "text1", ...] }
854 The list should have at least 15 items.

855 Here are the texts to summarize:
856 {texts}
```

857  
858 As GPT has no knowledge of the specifics of the dataset, we then manually parsed the proposed list  
859 and kept items that could be distinguished by non-experts based on visual information only. Some  
860 differences were not visible in our data. For instance, the "wrist snap" in basketball was excluded,  
861 as it could not be discerned from the videos.  
862

863 As we found that GPT lost a lot of information from the expert commentary, we also manually  
parsed the expert comments and added key visual cues that were mentioned by the experts.

### B.3 GENERATING FINE-DIVING DIFFERENCE ANNOTATION TAXONOMY

For the diving dataset, we used the Difference Proposer. As all videos are of experts, there is little variation between the videos. We thus used the diving score annotations given in the dataset, to find pairs of images with more variability and used those proposed differences that were discernible in these pairs.

## C BENCHMARK: ANNOTATION DETAILS

Two annotators were provided with a list of variations and a folder containing all videos as well as concatenated videos of two actions next to each other. They were instructed to annotate differences only as such, if they were obvious. The instructions for the annotators were as follows:

```
You'll get pairs of videos and be asked questions about how they're
  ↳ different. They'll be specific questions:
- E.g. "Which one has a wider foot stance: (a) video A, (b) video B,
  ↳ or (c) they're the same.
- if it's hard to tell whether there really is a difference, then say
  ↳ "c". Rule of thumb: once you've found the important point in the
  ↳ video, if it takes you more than 10 seconds to make a decision,
  ↳ then say "c".
```

### C.1 BENCHMARK: THE DIFFERENCE TAXONOMY

The difference taxonomy is available as part of the benchmark release at [this link](#). The full list of differences can also be previewed in the analysis table [14](#).

### C.2 BENCHMARK: RETRIEVAL ANNOTATION GENERATION

For the closed-evaluation scenario, we need to temporally align the videos we wish to compare. For this alignment, we annotate retrievals, which are important and identifiable moments within an action. To generate retrievals, we used the Frame localizer, where we prompt GPT4-V to propose stages for a given action (see Section [C.3](#) for details). We found that the stages were sometimes too coarse. We thus either manually identified key moments that helped retrieve sections of the videos important for comparing differences, or, for JIGSAWS consulted our expert. The retrieval annotations are available as part of the VidDiffBench benchmark release, and are in the folder called 'retrieval'.

### C.3 PROMPTS FOR ACTION ASSIGNMENT TO THE EASY/MEDIUM/HARD SPLITS

```
I'm designing a benchmark for comparing pairs of videos of the same
  ↳ action.
We have many actions and each action has a list of differences we look
  ↳ for.
The benchmark's task is to examine differences and say whether the
  ↳ statement applies more to "video A" or "video B".

Below we show a dictionary where each element is a single action.
Each action has an "action_description" describing the action.
It also has "average_seconds_per_video", for the median length of videos
  ↳ in seconds.
Each action has a dictionary of "differences", where each difference has
  ↳ these keys:
- 'name' for the difference
- 'description' describing the difference

Finally, for each action, there are two unfinished options:
- 'split' which currently says 'easy|medium|hard'
- 'split_reason' which currently says '...'
Your task is to fill in these values:
```

```

918 - Decide whether the 'split' value is 'easy', 'medium' or 'hard'. This
919 ↪ evaluation judges the difficulty of performing actionn difference
920 ↪ comparison for all differences within an action. Having a high
921 ↪ number of actions should not be considered as criteria for
922 ↪ difficulty.
923 - Justify your choice in 'split_reason'.
924
925 Return the same dictionary as json, with the values of 'split' and
926 ↪ 'split_reason' populated.
927 Here are the actions.
928 {actions}

```

The actions field is replaced with a json with the structure that is described in the prompt.

#### C.4 DIFFICULTY SPLITS

The result of the difficulty splits is in table 6.

Table 6: The difficulty splits with action code and names

| Split  | Action       | Action Name                               | Action description                                                                                                                                                                                                                                                                                                                                                                                                                                           |
|--------|--------------|-------------------------------------------|--------------------------------------------------------------------------------------------------------------------------------------------------------------------------------------------------------------------------------------------------------------------------------------------------------------------------------------------------------------------------------------------------------------------------------------------------------------|
| easy   | fitness_0    | Hip circle anticlockwise                  | fitness exercise called standing hip circle with hands on hips, one rotation anticlockwise                                                                                                                                                                                                                                                                                                                                                                   |
| easy   | fitness_3    | lucky cat                                 | fitness exercise called two arm standing lucky cat starting with arms up, one repetition                                                                                                                                                                                                                                                                                                                                                                     |
| easy   | fitness_4    | Squat Knee Raise side view                | squat without weights, then knee raise on left side                                                                                                                                                                                                                                                                                                                                                                                                          |
| easy   | fitness_6    | Hip circle clockwise                      | fitness exercise called standing hip circle with hands on hips, one rotation clockwise                                                                                                                                                                                                                                                                                                                                                                       |
| medium | ballsports_0 | basketball jump shot                      | a person is doing a basketball mid-range jump shot, starting with the ball in their hand, no defense, practice only                                                                                                                                                                                                                                                                                                                                          |
| medium | ballsports_1 | basketball mikan layup                    | a person does the Basketball drill called the Mikan layup where they start under the basket, do a layup with the right hand and catch it, do a left hand layup and catch it, no defense, practice only                                                                                                                                                                                                                                                       |
| medium | ballsports_2 | basketball reverse layup                  | a person playing basketball does a reverse layup starting from the left side of the basket and lays it up with their right hand on the right hand side, no defense, practice only                                                                                                                                                                                                                                                                            |
| medium | ballsports_3 | soccer penalty kick                       | a person does a soccer drill where they do a single penalty kick, practice only, no defense, no goalie                                                                                                                                                                                                                                                                                                                                                       |
| medium | diving_0     | diving                                    | competitive diving from 10m                                                                                                                                                                                                                                                                                                                                                                                                                                  |
| medium | fitness_1    | Opening and closing step left side first  | fitness exercise called opening and closing step on left side and then opening and closing step on right side                                                                                                                                                                                                                                                                                                                                                |
| medium | fitness_2    | car deadlift                              | a single free weight deadlift without any weight                                                                                                                                                                                                                                                                                                                                                                                                             |
| medium | fitness_5    | Squat Knee Raise diagonal view            | a squat then a knee raise on left side                                                                                                                                                                                                                                                                                                                                                                                                                       |
| medium | fitness_7    | Opening and closing step right side first | fitness exercise called opening and closing step on right side and then opening and closing step on left side                                                                                                                                                                                                                                                                                                                                                |
| hard   | music_0      | piano                                     | a person is playing scales on the piano                                                                                                                                                                                                                                                                                                                                                                                                                      |
| hard   | music_1      | guitar                                    | a person is playing scales on the guitar                                                                                                                                                                                                                                                                                                                                                                                                                     |
| hard   | surgery_0    | Knot Tying                                | The subject picks up one end of a suture tied to a flexible tube attached at its ends to the surface of the bench-top model, and ties a single loop knot.                                                                                                                                                                                                                                                                                                    |
| hard   | surgery_1    | Suturing                                  | The subject picks up needle, proceeds to the incision (designated as a vertical line on the bench-top model), and passes the needle through the fake tissue, entering at the dot marked on one side of the incision and exiting at the corresponding dot marked on the other side of the incision. After the first needle pass, the subject extracts the needle out of the tissue, passes it to the right hand and repeats the needle pass three more times. |
| hard   | surgery_2    | Needle Passing                            | The subject picks up the needle (in some cases not captured in the video) and passes it through four small metal hoops from right to left. The hoops are attached at a small height above the surface of the bench-top model.                                                                                                                                                                                                                                |

#### C.5 VALIDATING SPLIT GENERATION - HUMAN STUDY

Choosing the difficulty splits requires a holistic view of all the actions, so we decided it didn't make sense for experts to suggest them, since they are only familiar with a few actions each. On the other hand, we didn't want to rank the splits based on performance of current models since this felt like biasing towards current models; and besides, the performance for many actions in 'medium' and 'hard' is already random, so it would be hard to differentiate these actions. LLMs are a good

candidate because they have a good understanding of the actions and are relatively free of the biases of this paper’s authors. Furthermore, human annotators could not do the ranking, because no human annotated all the actions.

To further support the choice of an LLM, we asked 3 humans to rank the action comparisons from easiest to hardest, and compared against the LLM ranking. We then computed the Spearman’s rank correlation between all ranking sets, and the results are in table 7. The mean of the pairwise correlations between the humans was 0.602, while the mean of pairwise correlations between the LLM and humans was higher at 0.673. This shows (i) that there is non-negligible variability in human rankings, and (ii) that the LLM ranking is reasonable, and actually better correlated with most humans compared to several of the human annotations.

Table 7: Results on human evaluation study on choosing the splits. This is the Spearman’s rank correlation between the ranks of action difficulty, comparing our LLM approach and 3 humans.

|         | LLM  | Human 1 | Human 2 | Human 3 |
|---------|------|---------|---------|---------|
| LLM     |      | 53.1    | 68.0    | 80.6    |
| Human 1 | 53.1 |         | 45.9    | 64.5    |
| Human 2 | 68.0 | 45.9    |         | 70.3    |
| Human 3 | 80.6 | 64.5    | 70.3    |         |
| Average | 67.3 | 54.5    | 61.4    | 71.8    |

## C.6 FURTHER DATASET CONSTRUCTION CONSIDERATIONS

**Camera angles** The change of camera angle perspective does make the task harder. For samples in the ‘Fitness’ category, the camera angle is the same because the source dataset has a fixed camera rig, and we chose to use the same camera angle. For samples in ‘diving’ and ‘surgery’ categories, the camera angle is approximately the same. On the other hand, samples from ‘ballsports’ and ‘music’ categories can change. A related attribute (not mentioned here) is differences in background – similarly the ‘ballsports’ and ‘music’ categories often had different backgrounds as well. Importantly, these attributes were considered when assigning the difficulty splits. This may partly explain why the fitness exercises are all in the easy and medium split.

**FPS** Each video pair has the same fps. In case others want to leverage our code with new videos, our code does handles the case where FPS is different. Specifically, the input configuration has a value for the target FPS for running inference, and we subsample the video to have this FPS. (If the videos cannot be subsampled to have the exact target fps, then a warning is printed).

**Impact of different actor heights** For annotator instructions, we clarified that all differences on things like distance should be relative to the actor’s height. We gave the example of ‘wider foot stance’, saying that if a 5ft actor and a 6ft actor both had their legs 3ft apart, then the shorter actor has a ‘wider foot stance’ relative to their height. This reflects what is commonly understood by descriptions like these in skills coaching.

## D BENCHMARK STATISTICS

Beyond the main statistics in the main, table 8 shows further statistics broken down by difficulty splits.

Average video length is longer as the difficulty gets higher: 2.1/3.9/18.7 seconds, for easy/medium/hard. Compared to video QA datasets, the lengths are relatively shorter because we focus on fine-grained action understanding in how actions are performed. The total length of videos is 163 minutes.

**Retrieval tags, temporal bias** For the ‘retrieval tags’, we first show the number of retrieval tags – 9554 total. To give insight into their distribution within each video, each instance is normalized to the video length, and compute its ‘video location’. E.g. in a squat, the starting position might

Table 8: Detailed data statistics by split

| Split                                     | easy        | medium       | hard        | Overall        |
|-------------------------------------------|-------------|--------------|-------------|----------------|
| # video pairs                             | 95          | 265          | 197         | 557            |
| Avg video length (secs)                   | 2.1         | 3.9          | 18.7        | 8.8            |
| Total video length (mins)                 | 6.5         | 34.7         | 122.5       | 163.7          |
| # differences tagged                      | 1224        | 4788         | 3542        | 9554           |
| StdDev within retrieval type              | 8.4%        | 5.2%         | 4.1%        | 5.9%           |
| StdDev across retrieval types             | 17.3%       | 25.7%        | 20.2%       | 21.0%          |
| Difference annotations count              | 578         | 1771         | 2370        | 4719           |
| Difference annotations A/B/C distribution | 167/190/221 | 622/605/1143 | 435/452/884 | 1224/1247/2248 |

be position 0.1, the bottom of the descent 0.45, and the squat finish at 0.87. Within each retrieval type, we compute ‘StdDev within retrieval type’, which intuitively measures how well-aligned are the key points in the video. For example, if the average squat video records ‘bottom of descent’ at location 0.45, and ‘within StdDev’ is 0.06, then the mean distance from the average is 0.06 (so at 0.39 or 0.51). The ‘within StdDev’ is on average 0.059, indicating there is some variation in retrieval position, but there is temporal bias. This is expected since each video is trimmed and contains an atomic action. Future benchmarks could use untrimmed videos to make retrieval annotations less aligned, but the present benchmark is already difficult for SOTA models, so this is unnecessary now.

**Retrieval tags, coverage** We also measure ‘StdDev across retrieval types’, meaning the standard deviation of different retrieval classes within one video. Intuitively this measures how much of the video is ‘covered’ by retrieval keypoints. This is 0.21 on average. So if the mean of retrieval keypoints were 0.5, then the average retrieval annotations is around 0.29 or 0.71 in the video.

**A/B/C distribution** Additionally, we have shown the count of difference annotations and the A/B/C distribution; the ‘no difference’ annotation of ‘C’ is the most prevalent.

## E BENCHMARK: RELATED VIDEO PAIR DATASETS

A small number of prior works have datasets of paired videos with some label of the difference. However none have labels for fine-grained comparison while also having a large scale.

- [Nagarajan & Torresani \(2024\)](#) has a large-scale dataset of video differences in instructional video – large enough to be used for instruction tuning. However their differences are very coarse-grained, for example ‘cooking video A forgot to add salt’. Here, large-scale is possible because differences can be derived automatically from annotated instructional video datasets.
- [\(Balakrishnan et al., 2015\)](#) considers fine-grained action differences. However their dataset is very small (less than 50), and they have no labels.
- [\(Doughty et al., 2018\)](#) has a dataset of paired actions called EPIC-Skills2018. Here, the scale is large, but the difference label is more coarse: a binary for which video shows more skill.

## F EVALUATION

The evaluation code is available at this anonymized GitHub repo [https://anonymous.4open.science/r/VidDiffBench\\_eval-A0C1/README.md](https://anonymous.4open.science/r/VidDiffBench_eval-A0C1/README.md). The main file is `eval_viddiff.py`.

### F.1 CLOSED EVALUATION DESIGN CHOICE

Our closed evaluation setting has options for ‘A’ and ‘B’, but not ‘c’. Our initial approach to formulating this did include an option ‘C’ for insignificant differences. However, the challenge of calibration made fair evaluation difficult. For example, when comparing two videos of a basketball shot to evaluate stance width, the question arises: how different is “different enough” to be both

relevant for skill learning and perceptible? Different annotators may apply varying thresholds for what constitutes a significant difference, leading to inconsistencies. Introducing option ‘C’ further complicates evaluation because it requires calibrating not only the human annotators but also the VLMs, which may have different internal thresholds for perceiving significance. To address these challenges, we adopted the following approach:

- Annotators were instructed to choose either ‘A’ or ‘B’ only when the difference was clearly perceptible.
- We limited the evaluation of VLMs to cases where there was a very clear ground truth answer of either ‘A’ or ‘B’.

This method ensures fairness by focusing on scenarios with unambiguous ground truth, avoiding complications introduced by subjective calibration thresholds. While we briefly discuss this in the section on annotation creation, we recognize that this is a nuanced point.

## F.2 EVALUATION: MATCHING WITH LLMs

As described in section [3.2](#), we use an LLM

We use ‘gpt-4o-2024-08-06’ with the following prompt for matching ground truth to predicted descriptions. We do one prompt per video pair sample.

```

You are analyzing videos of people performing a specific action
↪ described as "{action_description}."

In this task, a "difference" refers to how two people might perform the
↪ same action in distinct ways.
Each difference consists of:
- A name (key) and
- A description that explains how the two performances differ visually.

You are provided with two dictionaries:
- Dictionary 0: {differences0}
- Dictionary 1: {differences1}

Your task is to match the differences from Dictionary 0 to Dictionary 1.
↪ Here's how:
1. For each entry in Dictionary 0, find the best match in Dictionary 1.
2. Each item in Dictionary 1 can only be used once.
3. Only match entries if their description strings are visually similar,
↪ even if the word choices differ. If no suitable match exists, return
↪ "None."

Your output should be a JSON object where:
- The keys are from Dictionary 0: {dict0_keys}.
- The values are a key from Dictionary 1 or "None" if no match is found.
- The available keys from Dictionary 1 are: {dict1_keys}.

Example output format:
{
  "0": "3",
  "1": "None",
  "2": "1",
  "3": "5",
  ...
  "{final}" : "0"
}
Important: the keys in this dictionary should be" {dict0_keys}

```

We replace:

- {action\_description} with a string describing the action

- 1134 • `{differences0}` with a dictionary where keys are gt difference keys ("0", "1", ...
- 1135 and values which are strings describing differences.
- 1136 • `{differences1}` is the same as `{differences0}`, except for the predicting differ-
- 1137 ences.
- 1138 • `{dict_keys}` are the keys in `{differences0}`
- 1139 • `{dict1_keys}` are the keys in `{differences1}`
- 1140 • `{final}` is the highest key in `{differences0}`

1142 An issue with matching is that the prediction actually has the opposite value to the ground truth –  
 1143 e.g. “the arms are more straight” vs “the arms are more bent”. If this is the case, then the prediction  
 1144 ‘a’ should be reversed to ‘b’ and vice versa. To identify those cases, we use this prompt, and we  
 1145 evaluate them in batches of 6 difference sequences at once.

```

1147 Task:
1148 You will be given pairs of statements. Your task is to determine the
1149 ↪ logical relationship between each pair.
1150
1151 Instructions:
1152 1. Analyze Each Pair: For each pair of statements, carefully analyze
1153 ↪ their meaning and relationship.
1154 2. Categorization:
1155 - Return "0" if the statements are equivalent, very similar, or
1156 ↪ differ only in minor details.
1157   Example: "X is bigger than Y" and "X is larger than Y" should both
1158 ↪ return "0".
1159 - Return "1" if the statements are direct opposites in meaning.
1160   Example: "X is bigger than Y" and "X is smaller than Y" should
1161 ↪ return "1".
1162 3. Edge Cases:
1163 - Avoid returning "1" for statements that are not true opposites,
1164 ↪ even if they have some differences in detail or degree.
1165   Example: "X is much bigger than Y" and "X is slightly bigger than
1166 ↪ Y" should still return "0".
1167
1168 Output Format:
1169 - Your response should be a JSON object with a single key "results" and
1170 ↪ an array of string values "0" or "1" as its value.
1171 - The array should exactly match the number of statement pairs given in
1172 ↪ the input.
1173
1174 Input Format:
1175 - The list of statement pairs will be provided in the following format:
1176
1177 {statements}
1178
1179 Important Requirements:
1180 - Ensure that each value in the output array is either "0" or "1".
1181 - The length of the "results" array must exactly match the number of
1182 ↪ input pairs.

```

1178 We replace the `{statements}` with a list, where each element is a two element list of strings,  
 1179 which are matched difference descriptions.

### 1181 F.3 PROMPTS FOR LMM BASELINES

1183 The LMM baselines – GPT, Gemini, and Qwen – all receive the same prompts. Prompts for action  
 1184 assignment to the easy/medium/hard splits:

```

1186 Here are two videos of an action with the following description:
1187 ↪ "{action_description}".
1188 {video_representation_description}

```

1188

1189

Below is a set of identified differences that describe how the action be  
 ↪ performed differently.

Each difference is associated with a unique key:

```
{differences_annotated}
```

1193

Your task is to predict, for each difference, whether it is more true  
 ↪ for video 'a' or video 'b'.

```
{target_out}
```

1197

The {action\_description} is replaced with a string describing the action which is the same  
 as in table [13](#). The {differences\_annotated} is a dictionary mapping the ground truth  
 difference key to a difference description, and are the same strings used in table [14](#). The  
 {video\_representation\_description} tells the model how the video data is passed in.  
 If 2 videos – for Gemini and Qwen – then it's:

1203

```
We have passed 'video a' and 'video b' as videos to the prompt in that  

  ↪ order.
```

1205

If passing in the videos as frames – for GPT – then it's

1208

```
We have passed a sequence of images into the prompt.  

  The first {vid0_nframes} are video a. The last {vid1_nframes} are video  

  ↪ b.  

  The frame rate is the same and is {fps}.
```

1212

The open prompt is:

1214

```
Here are two videos of an action with the following description:  

  ↪ "{action_description}".  

  {video_representation_description}
```

Return a list of 'differences' in how the action is being performed.

Each difference should have a 'description' that is a specific  
 ↪ statements that is more true in one video compared to the other

↪ video.

Then there is a 'prediction' which is 'a' if the statement applies more  
 ↪ to video a and 'b' if it applies more to video b.

The difference descriptions should be visual and about how the action is  
 ↪ performed.

For example 'the jump is higher', or 'the arm is more straight'.

1227

The difference descriptions should not refer to a specific video.  
 For example you would not say 'the jump in video B is higher'.  
 Instead, the 'description' would be 'the jump is higher', and the  
 ↪ 'prediction' is 'b'.

1231

Suggest no more than {n\_differences} differences.

1233

Return a json like this, replacing '...' with actual content:

```
{  

  "0" : {  

    "description" : "...",  

    "prediction" : "a|b"  

  },  

  "1" : {  

    "description" : "...",  

    "prediction" : "a|b"  

  },  

}
```

1241



Table 9: Agreement rate of LLM and human predictions for the evaluation matching.

|                | LLM  | Human 1 | Human 2 | Human 3 |
|----------------|------|---------|---------|---------|
| <b>LLM</b>     |      | 72.4    | 74.0    | 70.1    |
| <b>Human 1</b> | 72.4 |         | 75.0    | 78.2    |
| <b>Human 2</b> | 74.0 | 75.0    |         | 73.9    |
| <b>Human 3</b> | 70.1 | 78.2    | 73.9    |         |
| <b>Average</b> | 72.2 | 75.2    | 74.3    | 74.0    |

```

} ...
}

```

#### F.4 VALIDATION OF MATCHING PROCESS

We leverage LLMs in open evaluation to identify matching between the ground truth difference description strings and the predicted differences. Here we validate that this is a reasonable approach.

**Robustness to multiple LLM runs** The LLM evaluation is robust to random seed. We repeated the evaluation five times with different random seeds and observed a standard deviation of only 0.7 in the final evaluation score. This indicates that the results are consistent across runs. Although the prompt was specifically engineered for the GPT-4o-2024-08-06 model, we ensured consistency by fixing the model for all evaluations, treating all comparisons under identical conditions.

**Comparison with Human Evaluation** To measure alignment with humans, we recruited 3 human annotators to perform open evaluation matching, each with 44 video pairs and 347 individual differences. For each video pair, they were provided with a list of ground truth differences, and asked to match each one to a predicted difference from a list, or to suggest no match. We calculated inter-rater agreement across annotators and the automated LLM system. The results are in table 9. We can see semantic matching proved to be challenging for humans – the mean of pairwise rater agreement from each human to the other humans was 75.7%. Meanwhile, the mean agreement between our automated system and human annotators was 73.9%. Therefore, our LLM-based approach is on par with human annotators, while being completely automatic.

**Details of Prompt for LLM Evaluation** The LLM prompt was carefully developed using a prompt engineering workflow. We selected a set of four evaluation samples, covering two actions and two models, and iteratively refined the prompt based on performance in individual runs. For example, we added the instruction: "Only match entries if their description strings are visually similar, even if the word choices differ." This adjustment was necessary because the LLM struggled to match equivalent descriptions phrased differently (e.g., "the feet stance is wider" vs. "the legs are spread wider apart"). While this approach achieved satisfactory results, we acknowledge that the prompt could be further optimized using more systematic methods, such as DSPy (Khattab et al. 2024). Exploring such techniques is a promising direction for future work.

## G RESULTS: MORE ANALYSES

### G.1 RESULTS: ACTION-LEVEL MODEL COMPARISON

We have performed a more thorough comparison of the different state-of-the-art LMMs on VidDiff-Bench, added a small subsection to the results, and a discussion in appendix. Specifically we look at each action, and compare the different LMMs.

First, we show the correlations in the per-action scores between models in table 10.

The correlations are generally low, but there are 3 clusters of models. LLaVA-Video and Qwen2-VL are in a cluster; they are both open-source, and have the same LLM backbone. Then GPT-4o and Claude-Sonnet cluster together, and Gemini is not similar to any other model. We can speculate that for video data, Claude and GPT have similar training strategies, while Gemini’s is different.

Table 10: Correlations between models where the data is the action-level accuracy.

|                          | GPT   | Gemini | Claude | LLava-Video | Qwen2-VL |
|--------------------------|-------|--------|--------|-------------|----------|
| <b>GPT-4o</b>            |       | 0.152  | 0.375  | 0.243       | 0.273    |
| <b>Gemini-1.5-Pro</b>    | 0.152 |        | 0.215  | 0.111       | 0.223    |
| <b>Claude-3.5-Sonnet</b> | 0.375 | 0.215  |        | 0.261       | 0.220    |
| <b>LLaVA-Video</b>       | 0.243 | 0.111  | 0.261  |             | 0.376    |
| <b>Qwen2-VL-7b</b>       | 0.273 | 0.223  | 0.220  | 0.376       |          |

Table 11: Action-level scores for each model, and their differences compared to the average model score for that action. The model names are abbreviated and the full model names are GPT-4o, Gemini-1.5-Pro, Claude-3.5-Sonnet, LLaVA-Video-7B, Qwen2-VL-7B

| Split  | Action       | Action Name                               | Count | Scores |        |        |           |       | Avg  |
|--------|--------------|-------------------------------------------|-------|--------|--------|--------|-----------|-------|------|
|        |              |                                           |       | GPT    | Gemini | Claude | LLaVA-Vid | Qwen2 |      |
| easy   | fitness_0    | Hip circle anticlockwise                  | 129   | 56.6   | 58.1   | 56.6   | 51.9      | 45.0  | 53.6 |
| easy   | fitness_3    | lucky cat                                 | 62    | 53.2   | 58.1   | 43.5   | 58.1      | 45.2  | 51.6 |
| easy   | fitness_4    | Squat Knee Raise side view                | 43    | 65.1   | 69.8   | 37.2   | 69.8      | 55.8  | 59.5 |
| easy   | fitness_6    | Hip circle clockwise                      | 123   | 58.5   | 76.4   | 69.9   | 56.1      | 52.8  | 62.8 |
| medium | ballsports_0 | basketball jump shot                      | 96    | 55.2   | 57.3   | 52.1   | 57.3      | 61.5  | 56.7 |
| medium | ballsports_1 | basketball mikan layup                    | 148   | 56.8   | 49.3   | 46.6   | 51.4      | 56.1  | 52.0 |
| medium | ballsports_2 | basketball reverse layup                  | 125   | 46.4   | 55.2   | 49.6   | 44.0      | 50.4  | 49.1 |
| medium | ballsports_3 | soccer penalty kick                       | 70    | 51.4   | 60.0   | 57.1   | 70.0      | 54.3  | 58.6 |
| medium | diving_0     | diving                                    | 240   | 53.8   | 52.1   | 53.3   | 50.8      | 54.2  | 52.8 |
| medium | fitness_1    | Opening and closing step left side first  | 186   | 57.5   | 54.8   | 52.7   | 51.1      | 51.6  | 53.5 |
| medium | fitness_2    | car deadlift                              | 137   | 55.5   | 62.8   | 62.0   | 47.4      | 54.0  | 56.4 |
| medium | fitness_5    | Squat Knee Raise diagonal view            | 70    | 35.7   | 32.9   | 38.6   | 62.9      | 44.3  | 42.9 |
| medium | fitness_7    | Opening and closing step right side first | 155   | 52.9   | 52.9   | 63.2   | 49.7      | 52.9  | 54.3 |
| hard   | music_0      | piano                                     | 94    | 51.1   | 51.1   | 58.5   | 51.1      | 52.1  | 52.8 |
| hard   | music_1      | guitar                                    | 20    | 55.0   | 40.0   | 45.0   | 50.0      | 65.0  | 51.0 |
| hard   | surgery_0    | Knot Tying                                | 237   | 47.7   | 43.5   | 43.5   | 46.4      | 44.3  | 45.1 |
| hard   | surgery_1    | Suturing                                  | 309   | 48.9   | 51.5   | 48.2   | 47.6      | 50.2  | 49.3 |
| hard   | surgery_2    | Needle Passing                            | 211   | 51.7   | 46.9   | 49.8   | 48.8      | 50.2  | 49.5 |

Next we compare model performance within one action, and this is two large tables. table [11](#) is the action-level performance of each model. Then table [12](#) is the ‘relative performance’: the difference between the model score on that action compared to the mean score across all models for the action. The most significant results in the benchmark are on the easy split. Here, the improvement in score is uniform for all models. The models generally close perform similarly each other. The relative performance is usually less than 10 points – when it is higher, the sample size is very small.

By comparing models at the level of actions, we are considering smaller sample sizes than in the main results, which compare models at the level of easy/medium/hard splits. There is therefore lower statistical power to identify significant result differences, so the results are less certain. We elected not to compare model performance at the level of action differences, because here the sample sizes are very small, so any correlations would not meet significance thresholds.

## G.2 DETAILED DIFFERENCE ANALYSIS

In Section [6.3](#), we discuss an analysis of the accuracy at the difference level. The vary long table [14](#) gives the per-difference accuracies and p-values compared for the accuracy against a random guessing baselines. Each difference is associated with an action key, whose description is in table [13](#).

1350  
 1351  
 1352  
 1353  
 1354  
 1355  
 1356  
 1357  
 1358  
 1359  
 1360  
 1361  
 1362  
 1363  
 1364  
 1365  
 1366  
 1367  
 1368  
 1369  
 1370  
 1371  
 1372  
 1373  
 1374  
 1375  
 1376  
 1377  
 1378  
 1379  
 1380  
 1381  
 1382  
 1383  
 1384  
 1385  
 1386  
 1387  
 1388  
 1389  
 1390  
 1391  
 1392  
 1393  
 1394  
 1395  
 1396  
 1397  
 1398  
 1399  
 1400  
 1401  
 1402  
 1403

Table 12: Action-level difference scores for each model relative to the mean model score on that action. This is the difference with respect to the table [Table 11](#). The model names are abbreviated and the full model names are GPT-4o, Gemini-1.5-Pro, Claude-3.5-Sonnet, LLaVA-Video-7B, Qwen2-VL-7B

| Split  | Action       | Action Name                               | Count | Differences<br>GPT | Gemini | Claude | LLaVA-Vid | Qwen2 |
|--------|--------------|-------------------------------------------|-------|--------------------|--------|--------|-----------|-------|
| easy   | fitness_0    | Hip circle anticlockwise                  | 129   | 2.9                | 4.5    | 2.9    | -1.7      | -8.7  |
| easy   | fitness_3    | lucky cat                                 | 62    | 1.6                | 6.5    | -8.1   | 6.5       | -6.5  |
| easy   | fitness_4    | Squat Knee Raise side view                | 43    | 5.6                | 10.2   | -22.3  | 10.2      | -3.7  |
| easy   | fitness_6    | Hip circle clockwise                      | 123   | -4.2               | 13.7   | 7.2    | -6.7      | -9.9  |
| medium | ballsports_0 | basketball jump shot                      | 96    | -1.5               | 0.6    | -4.6   | 0.6       | 4.8   |
| medium | ballsports_1 | basketball mikan layup                    | 148   | 4.7                | -2.7   | -5.4   | -0.7      | 4.1   |
| medium | ballsports_2 | basketball reverse layup                  | 125   | -2.7               | 6.1    | 0.5    | -5.1      | 1.3   |
| medium | ballsports_3 | soccer penalty kick                       | 70    | -7.1               | 1.4    | -1.4   | 11.4      | -4.3  |
| medium | diving_0     | diving                                    | 240   | 0.9                | -0.8   | 0.5    | -2.0      | 1.3   |
| medium | fitness_1    | Opening and closing step left side first  | 186   | 4.0                | 1.3    | -0.9   | -2.5      | -1.9  |
| medium | fitness_2    | car deadlift                              | 137   | -0.9               | 6.4    | 5.7    | -8.9      | -2.3  |
| medium | fitness_5    | Squat Knee Raise diagonal view            | 70    | -7.1               | -10.0  | -4.3   | 20.0      | 1.4   |
| medium | fitness_7    | Opening and closing step right side first | 155   | -1.4               | -1.4   | 8.9    | -4.6      | -1.4  |
| hard   | music_0      | piano                                     | 94    | -1.7               | -1.7   | 5.7    | -1.7      | -0.6  |
| hard   | music_1      | guitar                                    | 20    | 4.0                | -11.0  | -6.0   | -1.0      | 14.0  |
| hard   | surgery_0    | Knot Tying                                | 237   | 2.6                | -1.6   | -1.6   | 1.4       | -0.8  |
| hard   | surgery_1    | Suturing                                  | 309   | -0.4               | 2.2    | -1.0   | -1.7      | 0.9   |
| hard   | surgery_2    | Needle Passing                            | 211   | 2.2                | -2.6   | 0.3    | -0.7      | 0.8   |

Table 13: Actions keys and their descriptions

| Action       | Action description                                                                                                                                                                                                                                                                                                                                                                                                                                           |
|--------------|--------------------------------------------------------------------------------------------------------------------------------------------------------------------------------------------------------------------------------------------------------------------------------------------------------------------------------------------------------------------------------------------------------------------------------------------------------------|
| ballsports_0 | a person is doing a basketball mid-range jump shot, starting with the ball in their hand, no defense, practice only                                                                                                                                                                                                                                                                                                                                          |
| ballsports_1 | a person does the Basketball drill called the Mikan layup where they start under the basket, do a layup with the right hand and catch it, do a left hand layup and catch it, no defense, practice only                                                                                                                                                                                                                                                       |
| ballsports_2 | a person playing basketball does a reverse layup starting from the left side of the basket and lays it up with their right hand on the right hand side, no defense, practice only                                                                                                                                                                                                                                                                            |
| ballsports_3 | a person does a soccer drill where they do a single penalty kick, practice only, no defense, no goalie                                                                                                                                                                                                                                                                                                                                                       |
| diving_0     | competitive diving from 10m                                                                                                                                                                                                                                                                                                                                                                                                                                  |
| fitness_0    | fitness exercise called standing hip circle with hands on hips, one rotation anti-clockwise                                                                                                                                                                                                                                                                                                                                                                  |
| fitness_1    | fitness exercise called opening and closing step on left side and then opening and closing step on right side                                                                                                                                                                                                                                                                                                                                                |
| fitness_2    | a single free weight deadlift without any weight                                                                                                                                                                                                                                                                                                                                                                                                             |
| fitness_3    | fitness exercise called two arm standing lucky cat starting with arms up, one repetition                                                                                                                                                                                                                                                                                                                                                                     |
| fitness_4    | squat without weights, then knee raise on left side                                                                                                                                                                                                                                                                                                                                                                                                          |
| fitness_5    | a squat then a knee raise on left side                                                                                                                                                                                                                                                                                                                                                                                                                       |
| fitness_6    | fitness exercise called standing hip circle with hands on hips, one rotation clockwise                                                                                                                                                                                                                                                                                                                                                                       |
| fitness_7    | fitness exercise called opening and closing step on right side and then opening and closing step on left side                                                                                                                                                                                                                                                                                                                                                |
| music_0      | a person is playing scales on the piano                                                                                                                                                                                                                                                                                                                                                                                                                      |
| music_1      | a person is playing scales on the guitar                                                                                                                                                                                                                                                                                                                                                                                                                     |
| surgery_0    | The subject picks up one end of a suture tied to a flexible tube attached at its ends to the surface of the bench-top model, and ties a single loop knot.                                                                                                                                                                                                                                                                                                    |
| surgery_1    | The subject picks up needle, proceeds to the incision (designated as a vertical line on the bench-top model), and passes the needle through the fake tissue, entering at the dot marked on one side of the incision and exiting at the corresponding dot marked on the other side of the incision. After the first needle pass, the subject extracts the needle out of the tissue, passes it to the right hand and repeats the needle pass three more times. |
| surgery_2    | The subject picks up the needle (in some cases not captured in the video) and passes it through four small metal hoops from right to left. The hoops are attached at a small height above the surface of the bench-top model.                                                                                                                                                                                                                                |

Table 14: Difference-level accuracy scores for VidDiff. The ‘action’ values can be looked up at table 13. The grayed columns indicate a p-value &lt; 0.05 for the two-tailed binomial significance test

| Split  | Action       | Difference Description                                                                                                                                            | Mean score | Num Samples | p-value |
|--------|--------------|-------------------------------------------------------------------------------------------------------------------------------------------------------------------|------------|-------------|---------|
| easy   | fitness_6    | the head remains more vertical during the rotation                                                                                                                | 1          | 13          | 0       |
| medium | fitness_2    | the gaze is forward at the bottom of the deadlift                                                                                                                 | 1          | 7           | 0.016   |
| medium | ballsports_2 | they gather the ball with both hands                                                                                                                              | 1          | 2           | 0.5     |
| hard   | music_1      | The player uses a plectrum.                                                                                                                                       | 1          | 4           | 0.125   |
| medium | fitness_7    | the motion is faster                                                                                                                                              | 0.93       | 14          | 0.011   |
| medium | ballsports_1 | uses the non-shooting hand (the guide hand) for stabilizing the ball during the shot in the 1st shot                                                              | 0.9        | 10          | 0.02    |
| medium | fitness_2    | the knees bend less at the bottom of the deadlift                                                                                                                 | 0.89       | 19          | 0.004   |
| easy   | fitness_6    | the toes are more pointed out                                                                                                                                     | 0.88       | 16          | 0.004   |
| medium | ballsports_1 | they jump higher on the first shot                                                                                                                                | 0.83       | 12          | 0.107   |
| easy   | fitness_6    | the feet stance is wider                                                                                                                                          | 0.83       | 24          | 0.005   |
| medium | fitness_2    | the feet stance is wider                                                                                                                                          | 0.8        | 15          | 0.028   |
| easy   | fitness_3    | the feet stance is wider                                                                                                                                          | 0.8        | 5           | 0.313   |
| easy   | fitness_0    | the feet stance is wider                                                                                                                                          | 0.8        | 25          | 0.003   |
| medium | ballsports_1 | uses the non-shooting hand (the guide hand) for stabilizing the ball during the shot in the 2nd shot                                                              | 0.8        | 10          | 0.088   |
| medium | ballsports_0 | the shooter’s arm is more extended towards the basket                                                                                                             | 0.79       | 14          | 0.122   |
| medium | fitness_7    | the arms are elevated in an uneven way on the first step                                                                                                          | 0.75       | 20          | 0.03    |
| hard   | surgery_1    | The left graser supports the right grasper, by pressing down on the tissue.                                                                                       | 0.75       | 4           | 0.5     |
| medium | ballsports_0 | as the shooter begins extending the elbow to shoot, the non-shooting hand (the guide hand) is on the side of the ball and does not influence the balls trajectory | 0.75       | 12          | 0.107   |
| medium | ballsports_3 | they kick the ball harder                                                                                                                                         | 0.75       | 12          | 0.107   |
| medium | ballsports_2 | the non-jumping leg has a more elevated knee                                                                                                                      | 0.73       | 15          | 0.183   |
| medium | fitness_2    | the gaze is forward at the start of the motion                                                                                                                    | 0.73       | 11          | 0.322   |
| hard   | surgery_2    | The instrument tips are never out of view (occluded by instruments, or out of frame)                                                                              | 0.73       | 11          | 0.322   |
| medium | fitness_7    | the arms reach higher on the first step                                                                                                                           | 0.71       | 17          | 0.189   |
| hard   | surgery_2    | The second grasper is used to stabilize the target.                                                                                                               | 0.69       | 26          | 0.093   |
| medium | fitness_2    | the hands are lower at the bottom of the deadlift                                                                                                                 | 0.68       | 19          | 0.192   |
| easy   | fitness_3    | the upper arms are parallel to the ground at the start of the motion                                                                                              | 0.68       | 19          | 0.192   |
| medium | fitness_1    | the torso moves out further closer to the foot during the second step out                                                                                         | 0.67       | 21          | 0.194   |
| easy   | fitness_6    | the range of motion in the hips is larger                                                                                                                         | 0.67       | 24          | 0.156   |
| easy   | fitness_6    | The upper body rocks more in a forward-backward way                                                                                                               | 0.67       | 9           | 0.492   |
| medium | fitness_2    | the body is more locked out at the top of the deadlift                                                                                                            | 0.67       | 6           | 0.625   |
| medium | fitness_1    | the arms reach higher on the first step                                                                                                                           | 0.67       | 18          | 0.243   |
| medium | ballsports_2 | the ball is closer to the corner of the square on the backboard                                                                                                   | 0.67       | 9           | 0.492   |
| easy   | fitness_0    | The upper body rocks more in a forward-backward way                                                                                                               | 0.67       | 18          | 0.243   |
| medium | ballsports_3 | they rotate their hips more during the strike                                                                                                                     | 0.67       | 18          | 0.243   |
| medium | ballsports_3 | the head is facing the ball leading up to the strike                                                                                                              | 0.67       | 6           | 0.625   |
| hard   | music_0      | Rhythmic consistency is better maintained in Video A than in Video B.                                                                                             | 0.67       | 12          | 0.387   |
| easy   | fitness_0    | the toes are more pointed out                                                                                                                                     | 0.65       | 17          | 0.297   |
| medium | diving_0     | The size and volume of the splash created upon entry is larger for video A than video B.                                                                          | 0.65       | 48          | 0.052   |
| easy   | fitness_6    | the speed of hip rotation is faster                                                                                                                               | 0.64       | 25          | 0.122   |
| medium | ballsports_1 | they jump with two feet on the 1st shot                                                                                                                           | 0.64       | 11          | 0.451   |
| medium | diving_0     | Diver enters the water at an angle closer to 90 degrees in video A than in video B.                                                                               | 0.63       | 30          | 0.161   |
| medium | fitness_1    | the arms are elevated in an uneven way on the second step                                                                                                         | 0.63       | 19          | 0.192   |
| easy   | fitness_0    | the range of motion in the hips is larger                                                                                                                         | 0.63       | 19          | 0.192   |
| hard   | surgery_0    | The tube in Video A moves more than in Video B.                                                                                                                   | 0.63       | 27          | 0.194   |
| easy   | fitness_4    | the squat is deeper, measured by angle of the thigh to the ground                                                                                                 | 0.63       | 16          | 0.244   |
| easy   | fitness_3    | the toes are more pointed out                                                                                                                                     | 0.63       | 8           | 0.438   |
| medium | fitness_7    | the toes are more pointed outwards on the first step out                                                                                                          | 0.63       | 8           | 0.438   |
| hard   | music_0      | Forearm movement is more controlled and minimal in Video A than in Video B.                                                                                       | 0.62       | 13          | 0.419   |
| medium | fitness_1    | the second step out is wider                                                                                                                                      | 0.62       | 13          | 0.419   |
| medium | fitness_1    | the arms reach higher on the second step                                                                                                                          | 0.61       | 18          | 0.334   |
| easy   | fitness_0    | the head remains more vertical during the rotation                                                                                                                | 0.61       | 18          | 0.334   |
| medium | ballsports_1 | the non-jumping leg has a more elevated knee in the 2nd shot                                                                                                      | 0.6        | 5           | 0.625   |
| medium | ballsports_0 | the shooter’s jump is more vertical than forward                                                                                                                  | 0.6        | 5           | 0.625   |
| medium | ballsports_2 | the gaze is more up and forward instead of down on the 2nd last step                                                                                              | 0.6        | 10          | 0.41    |
| medium | ballsports_1 | the arm is more fully extended towards the basket in the follow through in the 2nd shot                                                                           | 0.6        | 15          | 0.305   |
| medium | ballsports_0 | the shooter’s feet stance is wider when starting the shooting motion                                                                                              | 0.6        | 10          | 0.41    |
| medium | ballsports_1 | the body moves more forward during the 2nd shot, rather than up or back                                                                                           | 0.6        | 10          | 0.41    |
| medium | ballsports_3 | the non-kicking foot is planted closer to the ball                                                                                                                | 0.6        | 10          | 0.41    |
| hard   | surgery_0    | The tension on the suturing material and the tissue is better controlled in Video A than in Video B.                                                              | 0.59       | 32          | 0.162   |
| easy   | fitness_6    | the hand position is higher on the body                                                                                                                           | 0.58       | 12          | 0.451   |
| medium | ballsports_3 | the non-kicking foot is planted more next to the ball and less behind the ball                                                                                    | 0.58       | 12          | 0.451   |
| medium | ballsports_1 | they catch the ball in a higher position on the 1st shot                                                                                                          | 0.58       | 12          | 0.451   |
| easy   | fitness_0    | the hand position is higher on the body                                                                                                                           | 0.58       | 12          | 0.451   |
| hard   | music_0      | The speed of playing is higher in Video A than in Video B.                                                                                                        | 0.58       | 19          | 0.352   |
| hard   | surgery_1    | The instrument tips are never out of view (occluded by instruments, or out of frame)                                                                              | 0.58       | 19          | 0.352   |
| hard   | surgery_1    | The suturing speed is higher in Video A than in Video B                                                                                                           | 0.58       | 52          | 0.157   |
| hard   | surgery_2    | The movement of the needle through the hoop is more radial in Video A than in Video B.                                                                            | 0.58       | 26          | 0.288   |
| hard   | surgery_1    | The tension on the suturing thread is lower in Video A than in Video B.                                                                                           | 0.57       | 28          | 0.279   |
| medium | fitness_7    | the arms are elevated in an uneven way on the second step                                                                                                         | 0.56       | 16          | 0.349   |
| medium | fitness_1    | the arms are elevated in an uneven way on the first step                                                                                                          | 0.56       | 16          | 0.349   |
| hard   | surgery_2    | The number of movements to arrange the needle before threading is lower in Video A than in Video B.                                                               | 0.56       | 41          | 0.223   |
| hard   | surgery_1    | The movement is more fluid in Video A than in Video B.                                                                                                            | 0.56       | 43          | 0.218   |
| hard   | surgery_1    | The grasper in Video A is more quickly positioned on the needle than in Video B.                                                                                  | 0.56       | 43          | 0.218   |
| medium | fitness_7    | the toes are more pointed outwards on the second step out                                                                                                         | 0.56       | 9           | 0.492   |
| medium | diving_0     | Diver rotates forward relative to themselves.                                                                                                                     | 0.56       | 27          | 0.299   |
| medium | ballsports_2 | they get deeper knee bend before jumping                                                                                                                          | 0.56       | 9           | 0.492   |
| easy   | fitness_0    | the speed of hip rotation is faster                                                                                                                               | 0.55       | 20          | 0.32    |
| medium | ballsports_1 | they jump higher on the second shot                                                                                                                               | 0.55       | 11          | 0.451   |
| easy   | fitness_4    | the toes are more pointed out                                                                                                                                     | 0.54       | 13          | 0.419   |
| medium | ballsports_0 | the shooter’s feet position are more staggered, meaning the feet are at a different distance from the basket                                                      | 0.54       | 13          | 0.419   |

1512  
1513  
1514  
1515  
1516  
1517  
1518  
1519  
1520  
1521  
1522  
1523  
1524  
1525  
1526  
1527  
1528  
1529  
1530  
1531  
1532  
1533  
1534  
1535  
1536  
1537  
1538  
1539  
1540  
1541  
1542  
1543  
1544  
1545  
1546  
1547  
1548  
1549  
1550  
1551  
1552  
1553  
1554  
1555  
1556  
1557  
1558  
1559  
1560  
1561  
1562  
1563  
1564  
1565

|        |              |                                                                                                                                                                                               |      |    |       |
|--------|--------------|-----------------------------------------------------------------------------------------------------------------------------------------------------------------------------------------------|------|----|-------|
| medium | diving_0     | Duration from jump off the board to water entry in longer in video A than in video B.                                                                                                         | 0.54 | 39 | 0.251 |
| medium | ballsports_0 | the shooter's knees are more bent before taking the shot                                                                                                                                      | 0.54 | 13 | 0.419 |
| medium | ballsports_2 | they use the non-shooting hand (the guide hand) for stabilizing the ball during the shot                                                                                                      | 0.53 | 17 | 0.371 |
| medium | fitness_5    | the squat is deeper, measured by angle of the thigh to the ground                                                                                                                             | 0.53 | 17 | 0.371 |
| hard   | surgery_2    | The needle is grasped closer to the tip in Video A than in video B.                                                                                                                           | 0.52 | 21 | 0.336 |
| hard   | surgery_2    | The force on the target is lower in Video A than in Video B.                                                                                                                                  | 0.51 | 37 | 0.257 |
| medium | diving_0     | Diver's body is more straight in video A than in video B.                                                                                                                                     | 0.51 | 39 | 0.251 |
| medium | ballsports_1 | they have better balance when landing on the 1st shot                                                                                                                                         | 0.5  | 2  | 1     |
| medium | diving_0     | Speed at which divers rotate during the dive in larger in video A than in video B.                                                                                                            | 0.5  | 38 | 0.257 |
| medium | fitness_7    | the arms reach higher on the second step                                                                                                                                                      | 0.5  | 14 | 0.419 |
| medium | ballsports_1 | they have better balance when landing on the 2nd shot                                                                                                                                         | 0.5  | 2  | 1     |
| hard   | music_1      | Smooth transitions between strings with minimal disruption to the rhythm or tempo. Transitions in Video A are smoother than in Video B.                                                       | 0.5  | 2  | 1     |
| hard   | music_1      | Guiatrists uses finger vibrato.                                                                                                                                                               | 0.5  | 2  | 1     |
| medium | ballsports_3 | the body (or torso) is more facing the net, or more 'square' to the net                                                                                                                       | 0.5  | 12 | 0.451 |
| medium | fitness_7    | the first step out is wider                                                                                                                                                                   | 0.47 | 17 | 0.297 |
| hard   | surgery_0    | The movements in Video A are more precise than in Video B.                                                                                                                                    | 0.47 | 34 | 0.216 |
| easy   | fitness_3    | the speed of the arms is faster                                                                                                                                                               | 0.47 | 17 | 0.297 |
| medium | ballsports_2 | they land on two feet                                                                                                                                                                         | 0.47 | 17 | 0.297 |
| medium | ballsports_2 | they follow through more and towards the basket                                                                                                                                               | 0.47 | 15 | 0.305 |
| medium | fitness_2    | the toes are more pointed out                                                                                                                                                                 | 0.47 | 15 | 0.305 |
| medium | fitness_2    | there is a pause at the bottom of the deadlift                                                                                                                                                | 0.47 | 15 | 0.305 |
| medium | fitness_7    | the second step out is wider                                                                                                                                                                  | 0.46 | 13 | 0.314 |
| hard   | surgery_1    | The needle is inserted in the fabric more perpendicular to the incision.                                                                                                                      | 0.46 | 13 | 0.314 |
| medium | fitness_1    | the toes are more pointed outwards on the first step out                                                                                                                                      | 0.46 | 13 | 0.314 |
| hard   | music_0      | The smoothness of thumb crossing is more evident in Video A than in Video B.                                                                                                                  | 0.46 | 13 | 0.314 |
| easy   | fitness_3    | the upper arms more stable through the entire motion                                                                                                                                          | 0.46 | 13 | 0.314 |
| medium | ballsports_1 | they jump off the right foot for right-hand shot (the 2nd shot)                                                                                                                               | 0.45 | 11 | 0.322 |
| medium | ballsports_2 | before raising the ball to shoot, the ball is more to the right side of the hip                                                                                                               | 0.45 | 11 | 0.322 |
| hard   | surgery_1    | The force is applied in a more radial way in Video A than in Video B.                                                                                                                         | 0.45 | 31 | 0.192 |
| medium | fitness_7    | the torso moves out further closer to the foot during the first step out                                                                                                                      | 0.44 | 18 | 0.243 |
| medium | fitness_2    | the arms are in front of the body at the bottom of the deadlift                                                                                                                               | 0.44 | 9  | 0.328 |
| hard   | surgery_2    | The passage of the needle between two hands is more fluid in Video A than in Video B.                                                                                                         | 0.44 | 25 | 0.266 |
| medium | fitness_5    | the feet stance is wider                                                                                                                                                                      | 0.44 | 16 | 0.349 |
| hard   | music_0      | The wrist should be straight and not dipped or raised, facilitating fluid motion and avoiding strain. The wrist position is more appropriate in Video A than in Video B.                      | 0.43 | 14 | 0.244 |
| medium | fitness_2    | the entire motion is faster                                                                                                                                                                   | 0.43 | 21 | 0.194 |
| hard   | surgery_0    | The movements in Videos A are faster than in Video B.                                                                                                                                         | 0.43 | 42 | 0.116 |
| hard   | surgery_0    | More errors are corrected in Video A than in Video B.                                                                                                                                         | 0.42 | 31 | 0.131 |
| hard   | surgery_2    | The thread is more efficiently managed in Video A than in Video B.                                                                                                                            | 0.42 | 24 | 0.156 |
| medium | fitness_1    | the toes are more pointed outwards on the second step out                                                                                                                                     | 0.41 | 17 | 0.189 |
| hard   | surgery_1    | The instrument applies more force to the tissue and needle in Video A than in Video B                                                                                                         | 0.41 | 44 | 0.078 |
| hard   | surgery_0    | The movements in Video A are more efficient than in Video B.                                                                                                                                  | 0.4  | 42 | 0.076 |
| medium | ballsports_1 | the body moves more forward during the 1st shot, rather than up or back                                                                                                                       | 0.4  | 5  | 0.625 |
| medium | ballsports_0 | the shooter's feet are oriented more square to the basket when starting the shooting motion, meaning the feet point more forward                                                              | 0.38 | 13 | 0.175 |
| medium | ballsports_0 | as the shooter begins extending the elbow to shoot, the ball is more in front of the body, rather than behind the head                                                                        | 0.38 | 16 | 0.244 |
| hard   | surgery_1    | The dot is more accurately hit in Video A than in Video B                                                                                                                                     | 0.36 | 14 | 0.122 |
| hard   | music_0      | The body is closer to the piano in Video A than in Video B.                                                                                                                                   | 0.35 | 17 | 0.094 |
| medium | fitness_5    | the speed of the whole motion is faster                                                                                                                                                       | 0.35 | 17 | 0.094 |
| medium | ballsports_2 | they release the ball at a higher position                                                                                                                                                    | 0.35 | 20 | 0.148 |
| medium | ballsports_1 | the non-jumping leg has a more elevated knee in the 1st shot                                                                                                                                  | 0.33 | 9  | 0.141 |
| hard   | surgery_0    | Both graspers are used efficiently.                                                                                                                                                           | 0.33 | 9  | 0.141 |
| hard   | surgery_0    | The surgeon in Video A stops more often to plan next steps than the surgeon in Video B.                                                                                                       | 0.33 | 3  | 0.25  |
| hard   | music_0      | There are more wrong note corrections in Video A than in Video B.                                                                                                                             | 0.33 | 6  | 0.188 |
| medium | fitness_1    | the motion is faster                                                                                                                                                                          | 0.33 | 18 | 0.065 |
| medium | ballsports_1 | they have more fluid motion in moving between the shots                                                                                                                                       | 0.33 | 12 | 0.107 |
| hard   | music_1      | The left fingers in Video A are more curved / less collapsed than in video B.                                                                                                                 | 0.33 | 3  | 0.25  |
| medium | fitness_7    | the torso moves out further closer to the foot during the second step out                                                                                                                     | 0.33 | 9  | 0.141 |
| medium | diving_0     | Diver faces the water at jump off.                                                                                                                                                            | 0.32 | 19 | 0.044 |
| medium | fitness_1    | the first step out is wider                                                                                                                                                                   | 0.31 | 16 | 0.133 |
| medium | fitness_5    | during the squat descent, the knees cave inwards, instead of tracking over the feet                                                                                                           | 0.3  | 20 | 0.074 |
| medium | fitness_1    | the torso moves out further closer to the foot during the first step out                                                                                                                      | 0.29 | 17 | 0.036 |
| hard   | surgery_1    | The grasper grasps the needle approximately 2/3 from the needle tip. The needle is grasped more precisely in Video A than in Video B.                                                         | 0.29 | 34 | 0.006 |
| easy   | fitness_4    | the feet stance is wider                                                                                                                                                                      | 0.29 | 14 | 0.044 |
| hard   | music_1      | The unused left finger tips in Video A stay closer to the board than in video B.                                                                                                              | 0.25 | 4  | 0.5   |
| hard   | surgery_0    | The suturing thread tangles.                                                                                                                                                                  | 0.24 | 17 | 0.01  |
| medium | ballsports_1 | the arm is more fully extended towards the basket in the follow through in the 1st shot                                                                                                       | 0.18 | 11 | 0.011 |
| hard   | music_1      | Fingers should press strings at the center of the frets, avoiding the metal fret bars for clear sound production. Video A shows more accurate finger placement on the fretboard than Video B. | 0    | 2  | 0.5   |
| hard   | music_1      | Only one finger of the left hands rests on a string at a time.                                                                                                                                | 0    | 3  | 0.25  |

Table 15: Evaluating ‘easy’ split with variable video fps for three models. Our evaluation protocol chooses 4fps.

|                          | 1 fps | 2 fps | 4 fps | 8 fps | average |
|--------------------------|-------|-------|-------|-------|---------|
| <b>GPT-4o</b>            | 58.0  | 59.4  | 58.8  | 59.10 | 58.8    |
| <b>Gemini-1.5-Pro</b>    | 59.7  | 66.9  | 65.8  | 66.9  | 64.8    |
| <b>Claude-3.5-Sonnet</b> | 58.1  | 58.5  | 56.6  | 52.9  | 56.5    |

### G.3 RESULTS: DEPENDENCE ON FPS

The frame sampling rate, fps, is an important consideration for evaluating fine-grained actions. While typical video benchmarks like Video-MME (Fu et al. (2024)) sample videos at 1fps, we have sampled at a higher rate depending on category. The categories with shorter videos were sampled at a higher rate: 4fps for ‘fitness’, 5fps for ‘ballsports’, and 6fps for ‘diving’ (they are slightly different so they can be compatible with fps in the source dataset). We chose this relatively higher rate because we are interested in more fine-grained differences, while prior benchmarks are more coarse-grained; however we did not sample at even higher due to practical cost constraints of processing too many frames. The longer videos ‘surgery’ and ‘music’ were sampled at 1fps: these are longer videos where differences are discernible at lower sampling rates, and where the longer videos make high-fps sampling impractical.

To show that our fps is reasonable, we tested the three closed-source models on a range of fps levels on the ‘easy’ subset of closed evaluation. We chose this set because this is where statistically significant differences were clear. The results are in table 15.

Across all models, the sampling rate that we use, 4 fps, has reasonable scores, either at or above the average over the other fps values. For all models, the variability is low: GPT’s scores are within 0.8 points of the average; all other models have scores within 2.1 points of the average (except for the low sampling rate of 1fps in Gemini, where it degrades by 5.2 points). Moreover, the optimal fps is different for different models.

To help explain the results, we refer to the qualitative examples in the main results sections. The only ‘success cases’ for all our models were those having easy localization, and coarse differences. We hypothesize that fps is not important for these cases. Where fps is likely important -- fine-grained multiframe reasoning -- the current LMMs cannot perform better than random. So although 2fps currently has good performance, we believe that as LMMs improve, they will perform better on subtle motions and using a higher fps will be important.

### G.4 RESULTS: QWEN2-VL OPEN EVALUATION

Qwen2-VL performs especially poorly in open evaluation, which we investigate here. The key issue is that Qwen2-VL-7b was failing to follow the evaluation prompt, while the other compared models did follow it. We sampled 3 video pairs for each action and manually inspected Qwen’s responses, identifying multiple key issues. Below, we list each issue, and provide a quantitative estimate for the prevalence of each issue.

- (45% of differences) Proposing differences not relevant to \*how\* to perform actions, but instead are visual things like “The person in video a is wearing a blue jacket, while the person in video b is wearing a plaid shirt.” We estimated prevalence by using a gpt-4o query that we manually prompt engineered.
- (26% of differences) Proposing a difference that is actually not a difference, e.g. “The person in video a is performing the exercise with their arms out to the sides, while the person in video b is performing the exercise with their arms out to the sides.” We estimated prevalence by using a gpt-4o query that we manually prompt engineered.
- (56% of differences) are repeated, meaning when trying to propose multiple differences, it proposes the same difference multiple times. We could directly measure this prevalence exactly.

- (23% of actions) Proposing only a small number of differences – less than half as many as what is prompted for. We could directly measure this prevalence exactly.
- ( $\leq 5\%$  of differences) Proposing vague differences that are harder to interpret visually like “The player in video a has a more versatile and adaptable skill set than the player in video b”. We estimated prevalence by using a gpt-4o query that we manually prompt engineered.

Overall, only 31.9% of proposed differences by Qwen did not suffer from any of these errors. (Note that some differences suffered from multiple errors at the same time)

#### G.5 NO MULTIPLE CHOICE BIAS IN CLOSED EVALUATION

In multiple choice benchmarking, models may be biased towards one particular option, which can impact evaluation robustness. We find no evidence of this. Firstly, in closed evaluation, the A/B ratio is 0.493/0.507. Second, we test the impact of video order on GPT-4o for the ‘fitness’ category, which has samples in the easy and medium subsets (sample size 193). We test flipping the order of videos which flips the A/B answer. The performance is 54.8% in the original evaluation, and reversing the order of videos gives performance of 55.5%, showing a 0.7% difference. This result suggests that the performance on VidDiffBench is not significantly sensitive to video order.

#### G.6 EXPERIMENT ON DUPLICATING VIDEO

One idea to validate the reasonable-ness of the benchmark is to check what happens when passing an identical video as A and B to the system – we should expect that in closed evaluation, the predictions should be A/B 50% of the time. We did this experiment on the closed setting, for the ‘easy’ subset for GPT-4o. Over two random seeds, the results were 49.3 and 50.2. This is an interesting validation check that the benchmark passes.

#### G.7 NO MULTIPLE CHOICE BIAS IN CLOSED EVALUATION

In multiple choice benchmarking, models may be biased towards one particular option, which can impact evaluation robustness. We find no evidence of this. Firstly, in closed evaluation, the A/B ratio is 0.493/0.507. Second, we test the impact of video order on GPT-4o for the ‘fitness’ category, which has samples in the easy and medium subsets (sample size 193). We test flipping the order of videos which flips the A/B answer. The performance is 54.8% in the original evaluation, and reversing the order of videos gives performance of 55.5%, showing a 0.7% difference. This result suggests that the performance on VidDiffBench is not significantly sensitive to video order.

#### G.8 SAMPLE RETRIEVALS

In our methods, we leverage a frame localizer to find either a single frame or a small sequence of frames. These localized frames are then passed to the next stage. In fig. 4, we show a few examples of predictions vs ground truth for some frames

## H VIDDIFF METHOD

The code for VidDiff method is available at this anonymized GitHub repo [https://anonymous.4open.science/r/VidDiffBench\\_eval-A0C1/README.md](https://anonymous.4open.science/r/VidDiffBench_eval-A0C1/README.md) under the folder `viddiff_method.py`.

Here we show the prompts used in the different components.

**Proposer stage** . Part 1 chooses candidate differences (Open setting only):

```
I have two videos of an action with the following description:
↪ "{action}".

Propose a set of 'differences' in how this action may be performed
↪ between the two videos.
```



1674

1675

1676

1677

1678

1679

1680

1681

1682

1683

1684

1685

1686

1687

1688

1689

1690

1691

1692

1693

1694

1695

1696

1697

1698

1699

1700

1701

1702

1703

1704

1705

1706

1707

1708

1709

1710

1711

1712

1713

1714

1715

1716

1717

1718

1719

1720

1721

1722

1723

1724

1725

1726

1727

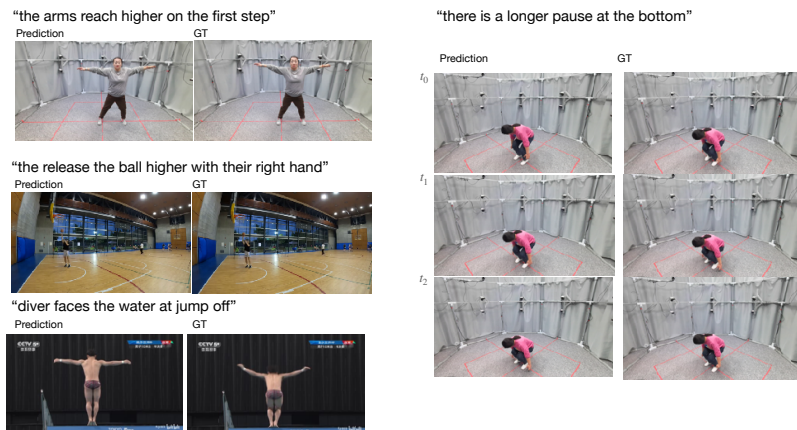

Figure 4: Sample frame localizations: prediction vs ground truth.

For each difference, give a 'name', 'description', 'query\_string', and  
 ↪ 'num\_frames'.

The 'name' is a very short name that can be used as a key.

The 'description' is a slightly longer description of the difference.

The 'query\_string' is the same as 'description'.

The descriptions should be visual and about how the action is  
 ↪ performed. For example 'the jump is higher', or 'the arm is more  
 ↪ straight'.

The difference descriptions should not refer to a specific video. For

↪ example you would not say 'the jump in video B is higher'.

Instead, the 'description' would be 'the jump is higher', and the

↪ statement could be more true of one video or the other.

Now suppose you had to judge whether the difference was stronger in one  
 ↪ video, but you could only look at individual frames.

- What's the smallest number of frames you need, assuming the  
 ↪ frame is well-chosen? Put the answer in 'num\_frames'. The  
 ↪ answer should be '1' or 'gt\_1' (meaning 'greater than 1').

- Once you have the frames to compare, create a 'query\_string'  
 ↪ that is a simple statement about this difference that is  
 ↪ more true in one video vs the other video (based on the  
 ↪ frames only). For example "the left leg is higher" or  
 ↪ "movement is faster".

List {n\_differences} differences.

Return a json like this, where the differences keys are stringified ints  
 ↪ starting from 0.

```
{
  '0' : {
    "name" : "...",
    "description" : "...",
    "query_string" : "...",
    "num_frames": "1|gt_1",
  },
  ...
}
```

Proposer part 2 estimates sub-action stages:

1728

1729

I have two videos of an action with the following description:

1730

↪ "{action}".

1731

Provide a 'stage transcript' as a list. These are sub-actions that make  
↪ up that action.

1733

Give 5 steps or fewer in the action transcript.

1734

1735

For each stage, give a 'name' for the stage, and a 'description' of that  
↪ stage.

1737

For each stage, give a list of 'retrieval\_strings'.

1738

These are strings that describe what is visible in the frame.

1739

Only describe the visual features. Only describe what is visible in a

1740

↪ single frame. Focus on appearance. Focus on pose. Do not use the

1741

↪ name of the action. Start each string with something similar to "A

1742

↪ photo of a ...".

1743

Give at least {n\_retrieval\_keys} retrieval strings per stage.

1744

Return a json like this:

1745

```
{
  "stages" : [
    {
      "name" : "",
      "description" : "...",
      "retrieval_strings" : ["A photo of a ...", ...],
    },
    ...
  ]
}
```

1752

1753

1754

And proposer part 3 does linking between those stages

1755

1756

I have two videos of an action with the following description:

1757

↪ "{action}".

1758

Here are a list of stages or subactions that make up that action:

1759

{stages}

1760

1761

We also have differences in how this action may be performed between the  
↪ two videos.

1762

The differences are specific statements that are more true in one video

1763

↪ vs another.

1764

Here they are:

1765

{differences}

1766

1767

Now we need to match each differences to a stage.

1768

Return a list of the stages using their names.

1769

If a difference is relevant to a particular stage, put its name in the

1770

↪ 'difference' list.

1771

It's okay for a 'difference' to be visible in multiple stages.

1772

It's okay for some stages to have no difference.

1773

Refer to stages and differences by their 'name' attribute.

1774

Return a json like this:

1775

```
[
  "<stage_name0>" : [<difference_name0>", "<difference_name1>",
  ↪ ...],
  "<stage_name1>" : [],
  "<stage_name2>" : [<difference_name1>", "<difference_name2>",
  ↪ ...],
  ...
]
```

1776

1777

1778

1779

1780

1781

Please be careful. Every difference must appear at least once

1782  
1783  
1784  
1785  
1786  
1787  
1788  
1789  
1790  
1791  
1792  
1793  
1794  
1795  
1796  
1797  
1798  
1799  
1800  
1801  
1802  
1803  
1804  
1805  
1806  
1807  
1808  
1809  
1810  
1811  
1812  
1813  
1814  
1815  
1816  
1817  
1818  
1819  
1820  
1821  
1822  
1823  
1824  
1825  
1826  
1827  
1828  
1829  
1830  
1831  
1832  
1833  
1834  
1835

### Frame Differencer

```
I have two videos of people performing an action with description:
↪ "{action}".
The first {num_frames} frames are from video A and the last {num_frames}
↪ frames are from video B.
For each video, the frames are very close together in the video: they
↪ are {time_diff} seconds apart.
Which one shows more of the variation with this description:
↪ "{query_string}"?
(a) video 1, (b) video 2, (c) similar or can't tell.
Answer in json: {'answer_detailed' : "...", 'answer':"a|b|c"}"
```

## I COMPUTATIONAL COSTS FOR VIDDIFF METHOD

Our method’s runtime is less than one minute per video pair using an A6000 GPU for running CLIP inference [Radford et al. \(2021\)](#). Additionally, we utilize the GPT API at an average cost of \$0.2 per sample [Achiam et al. \(2023\)](#). Notably, over 95% of the GPT cost arises from verbose VLM responses. Attempts to prompt for shorter responses resulted in degraded performance.

Methodologically, we rely on pre-trained zero-shot models, which limits their applicability in specialized domains, as discussed in our results. For evaluation, the Open setting formulation necessitates an LLM in the evaluation pipeline. One challenge is the subjectivity in annotations: determining which differences are relevant and what magnitude of difference is significant, though we thoroughly discuss this problem and mitigations.
